# Supplementary material for: Strategies to Address Misestimation of Energy Intake Based on Self-Report Dietary Consumption in Examining Associations Between Dietary Patterns and Cancer Risk
Source: MDPI journal article supplement (doi:10.3390/nu11112614), 2019-11-01
Supplement: s1 [file s1]

**Table S1** – Multivariable Cox proportional hazards ratio, from competing risk analysis to account for deaths before ACR linkage date in participants who were cancer-free during follow-up, of the incidence of All-Cancers for dietary patterns identified by cluster analysis and stratified by four methods to account for misreporting

| Accounting for misreporters | Dietary pattern | Men  |                           |                      |                        | Women |                           |                      |                           |
|-----------------------------|-----------------|------|---------------------------|----------------------|------------------------|-------|---------------------------|----------------------|---------------------------|
|                             |                 | N    | Cancer cases <sup>a</sup> | % of cases misreport | Cancer risk – HR [95%] | N     | Cancer cases <sup>a</sup> | % of cases misreport | Cancer risk – HR [95%]    |
| Inclusion                   | Healthy         | 2690 | 257                       | 57.2                 | 1.00                   | 4808  | 347                       | 54.2                 | 1.00                      |
|                             | Sweets/Dairy    | 3233 | 384                       | 46.6                 | 1.13 [0.96 - 1.33]     | 4790  | 419                       | 48.7                 | 1.11 [0.96 - 1.28]        |
|                             | Meats/Pizza     | 3924 | 341                       | 45.6                 | 1.10 [0.93 - 1.31]     | 6643  | 528                       | 43.9                 | 1.14 [0.99 - 1.32]        |
| InclusionNN                 | Healthy         | 3468 | 349                       | 47.0                 | 1.00                   | 5633  | 426                       | 51.9                 | 1.00                      |
|                             | Sweets/Dairy    | 2619 | 336                       | 47.5                 | 1.11 [0.95 - 1.30]     | 3559  | 287                       | 49.0                 | 1.10 [0.94 - 1.28]        |
|                             | Meats/Pizza     | 3760 | 297                       | 52.4                 | 0.95 [0.81 - 1.11]     | 7049  | 581                       | 42.9                 | <b>1.14 [1.00 - 1.30]</b> |
| ExBefore                    | Healthy         | 1780 | 185                       | --                   | 1.00                   | 2919  | 205                       | --                   | 1.00                      |
|                             | Sweets/Dairy    | 1221 | 160                       | --                   | 1.08 [0.87 - 1.35]     | 1873  | 164                       | --                   | <b>1.28 [1.04 - 1.58]</b> |
|                             | Meats/Pizza     | 2127 | 156                       | --                   | 0.85 [0.68 - 1.06]     | 3835  | 296                       | --                   | 1.12 [0.93 - 1.35]        |
| ExAfter                     | Healthy         | 1205 | 110                       | --                   | 1.00                   | 2239  | 159                       | --                   | 1.00                      |
|                             | Sweets/Dairy    | 1758 | 209                       | --                   | 1.17 [0.93 - 1.48]     | 2667  | 235                       | --                   | 1.17 [0.96 - 1.44]        |
|                             | Meats/Pizza     | 2165 | 182                       | --                   | 1.08 [0.84 - 1.39]     | 3621  | 271                       | --                   | 1.12 [0.91 - 1.38]        |

a – All primary cancer cases except non-melanoma skin cancer

**Table S2** - Multivariable Cox proportional hazards ratio, from competing risk analysis to account for deaths before ACR linkage date in participants who were cancer-free during follow-up, of the incidence of Dietary-Cancers<sup>a</sup> stratified by four methods to account for misreporting.

| Accounting for misreporters | Dietary pattern | Men  |                           |                      |                           | Women |                           |                      |                        |
|-----------------------------|-----------------|------|---------------------------|----------------------|---------------------------|-------|---------------------------|----------------------|------------------------|
|                             |                 | N    | Cancer cases <sup>a</sup> | % of cases misreport | Cancer risk - HR [95%]    | N     | Cancer cases <sup>a</sup> | % of cases misreport | Cancer risk - HR [95%] |
| Inclusion                   | Healthy         | 2690 | 52                        | 63.5                 | 1.00                      | 4808  | 241                       | 52.7                 | 1.00                   |
|                             | Sweets/Dairy    | 3233 | 107                       | 50.5                 | 1.35 [0.96 - 1.89]        | 4790  | 284                       | 43.7                 | 1.05 [0.88 - 1.25]     |
|                             | Meats/Pizza     | 3924 | 105                       | 38.1                 | <b>1.42 [1.00 - 2.02]</b> | 6643  | 380                       | 50.0                 | 1.13 [0.96 - 1.34]     |
| InclusionNN                 | Healthy         | 3468 | 73                        | 53.4                 | 1.00                      | 5633  | 303                       | 52.1                 | 1.00                   |
|                             | Sweets/Dairy    | 2619 | 110                       | 48.2                 | <b>1.45 [1.07 - 1.97]</b> | 3559  | 191                       | 43.5                 | 1.00 [0.84 - 1.21]     |
|                             | Meats/Pizza     | 3760 | 81                        | 43.2                 | 1.13 [0.82 - 1.57]        | 7049  | 411                       | 48.7                 | 1.10 [0.94 - 1.28]     |
| ExBefore                    | Healthy         | 1780 | 34                        | --                   | 1.00                      | 2919  | 145                       | --                   | 1.00                   |
|                             | Sweets/Dairy    | 1221 | 57                        | --                   | <b>1.74 [1.12 - 2.72]</b> | 1873  | 108                       | --                   | 1.17 [0.91 - 1.50]     |
|                             | Meats/Pizza     | 2127 | 46                        | --                   | 1.23 [0.77 - 1.95]        | 3835  | 211                       | --                   | 1.07 [0.85 - 1.34]     |
| ExAfter                     | Healthy         | 1205 | 19                        | --                   | 1.00                      | 2239  | 114                       | --                   | 1.00                   |
|                             | Sweets/Dairy    | 1758 | 53                        | --                   | 1.50 [0.88 - 2.56]        | 2667  | 160                       | --                   | 1.09 [0.86 - 1.40]     |
|                             | Meats/Pizza     | 2165 | 65                        | --                   | <b>1.92 [1.12 - 3.29]</b> | 3621  | 190                       | --                   | 1.02 [0.79 - 1.30]     |

a – Diet-related cancers based on World Cancer Research Fund/American Institute for Cancer Research Continuous Update Project (WCRF/AICR CUP) report

15 **Table S3** - Multivariable cox proportional hazards ratio, from competing risk analysis to account for deaths before ACR linkage date in participants who were  
 16 cancer-free during follow-up, of the incidence of Digestive-Cancers<sup>a</sup> stratified by four methods to account for misreporting

| Accounting for misreporters | Dietary pattern | Men  |                           |                      |                        | Women |                           |                      |                           |
|-----------------------------|-----------------|------|---------------------------|----------------------|------------------------|-------|---------------------------|----------------------|---------------------------|
|                             |                 | N    | Cancer cases <sup>a</sup> | % of cases misreport | Cancer risk - HR [95%] | N     | Cancer cases <sup>a</sup> | % of cases misreport | Cancer risk - HR [95%]    |
| Inclusion                   | Healthy         | 2690 | 38                        | 57.9                 | 1.00                   | 4808  | 51                        | 52.9                 | 1.00                      |
|                             | Sweets/Dairy    | 3233 | 76                        | 51.3                 | 1.43 [0.96 - 2.13]     | 4790  | 69                        | 34.8                 | 1.17 [0.81 - 1.69]        |
|                             | Meats/Pizza     | 3924 | 77                        | 40.3                 | 1.45 [0.96 - 2.18]     | 6643  | 81                        | 50.6                 | 1.22 [0.84 - 1.77]        |
| InclusionNN                 | Healthy         | 3468 | 58                        | 44.8                 | 1.00                   | 5633  | 60                        | 51.7                 | 1.00                      |
|                             | Sweets/Dairy    | 2619 | 69                        | 56.5                 | 1.23 [0.86 - 1.76]     | 3559  | 46                        | 34.8                 | 1.25 [0.84 - 1.84]        |
|                             | Meats/Pizza     | 3760 | 64                        | 42.2                 | 1.10 [0.77 - 1.60]     | 7049  | 98                        | 49.0                 | <b>1.43 [1.02 - 2.01]</b> |
| ExBefore                    | Healthy         | 1780 | 32                        | --                   | 1.00                   | 2919  | 29                        | --                   | 1.00                      |
|                             | Sweets/Dairy    | 1221 | 30                        | --                   | 1.08 [0.64 - 1.82]     | 1873  | 30                        | --                   | <b>1.73 [1.03 - 2.89]</b> |
|                             | Meats/Pizza     | 2127 | 37                        | --                   | 1.01 [0.61 - 1.67]     | 3835  | 50                        | --                   | 1.43 [0.88 - 2.33]        |
| ExAfter                     | Healthy         | 1205 | 16                        | --                   | 1.00                   | 2239  | 24                        | --                   | 1.00                      |
|                             | Sweets/Dairy    | 1758 | 37                        | --                   | 1.37 [0.76 - 2.49]     | 2667  | 45                        | --                   | 1.42 [0.86 - 2.35]        |
|                             | Meats/Pizza     | 2165 | 46                        | --                   | 1.62 [0.89 - 2.95]     | 3621  | 40                        | --                   | 1.13 [0.66 - 1.93]        |

17

18 a – Digestive system cancers based on World Health Organization (WHO) classification
